# Supplementary material
Source: publisher site journal article supplement (https://www.dovepress.com/article/253576)
Supplement: Supplementary file 1 [file get_supplementary_file.php]

**Supplementary data**

**RGD- and VEGF-mimetic peptide epitope-functionalized self-assembling peptide hydrogels promote dentin-pulp complex regeneration**

*Kun Xia1, 2, #, Zhuo Chen3,4, #, Jie Chen1, Huaxing Xu1, Yunfei Xu1, Ting Yang1, Qi Zhang1, **


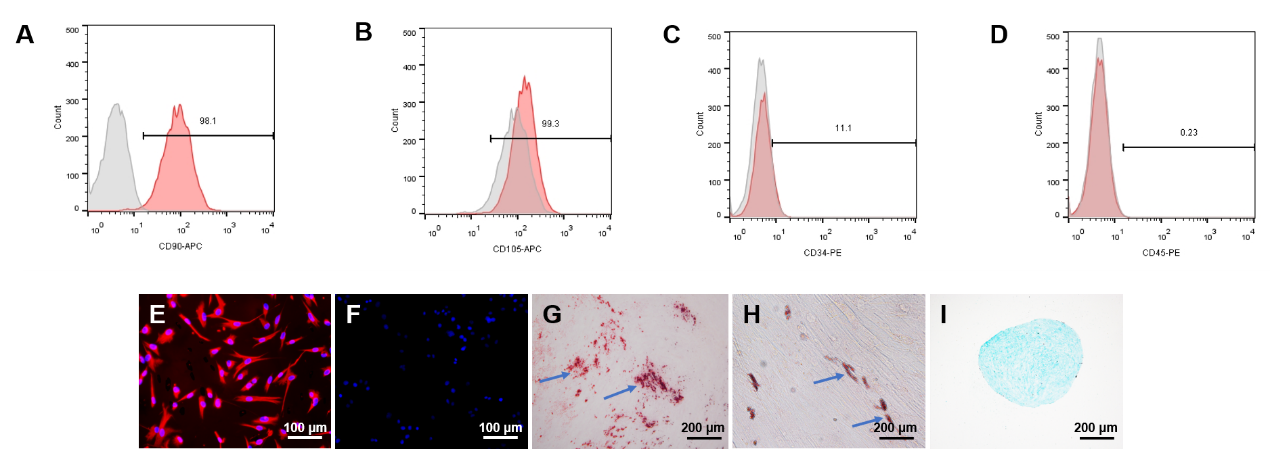


**Supplementary Figure S1.** Characterization of DPSCs isolated from freshly extracted human third molars. (A-D) Expression of CD90, CD105, CD34 and CD45 as analyzed by flow cytometry. (E) The red fluorescence shows the positivity for vimentin. (F) Fluorescence staining shows negativity for CK14. (G) Osteogenic differentiation resulting in –mineralized nodule formation as shown by Alizarin Red staining after 3 weeks of induction. (H)Adipogenic differentiation resulting in -lipid droplet formation as shown by Oil Red O staining after 3 weeks of induction. (I) Chondrogenic differentiation resulting in -cartilage ball formation as shown by methylene blue staining after 3 weeks of induction.
